# Supplementary material for: Waste By-Product of Grape Seed Oil Production: Chemical Characterization for Use as a Food and Feed Supplement
Source: MDPI journal article supplement (doi:10.3390/life13020326), 2023-01-24
Supplement: s1 [file s1]

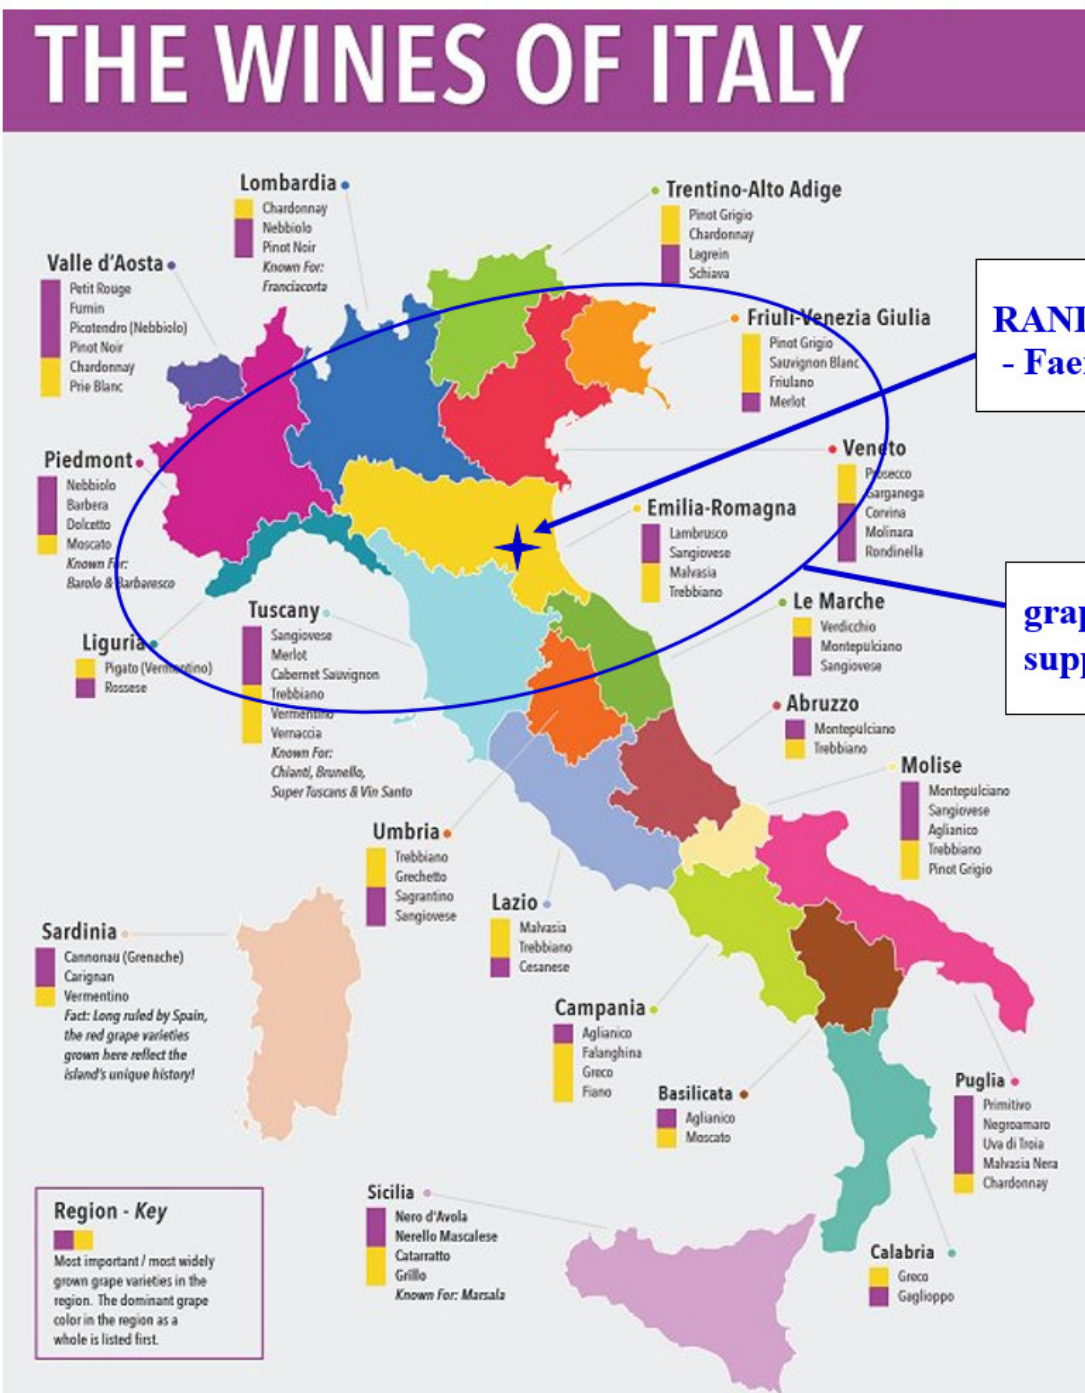

Figure S1. The wines of Italy: Randi Group supply area.

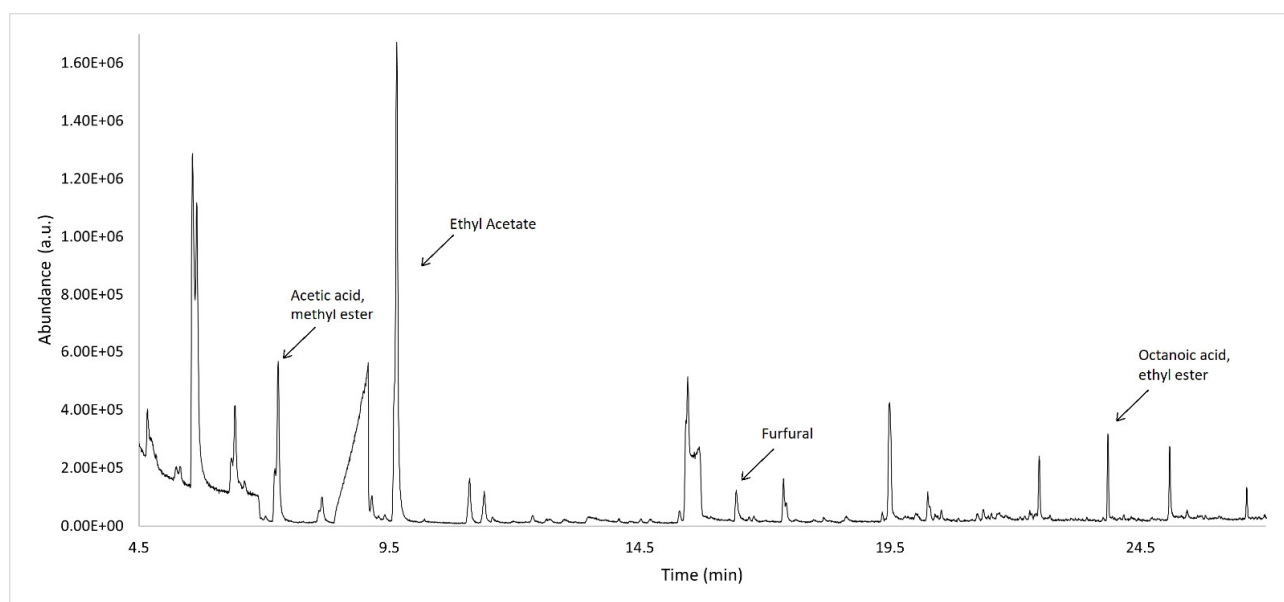

**Figure S2.** Total ion current chromatogram of VOCs from the DGS sample, obtained using HS-SPME-GC-MS.
